# Supplementary material for: High Resolution Mass Spectroscopy-Based Secondary Metabolite Profiling of Nymphaea nouchali (Burm. f) Stem Attenuates Oxidative Stress via Regulation of MAPK/Nrf2/HO-1/ROS Pathway
Source: MDPI journal article supplement (doi:10.3390/antiox10050719), 2021-05-03
Supplement: s1 [file s1]

## Supplementary Data

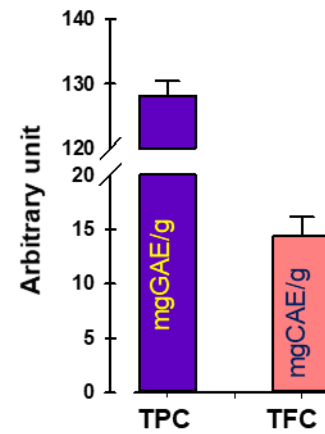

Figure S1: Total phenolic and flavonoid content of NNSE  
TPC: Total phenolic content (mgGAE/g extract)  
TFC: Total flavonoid content (mgCAE/g extract)

## Supplementary Data

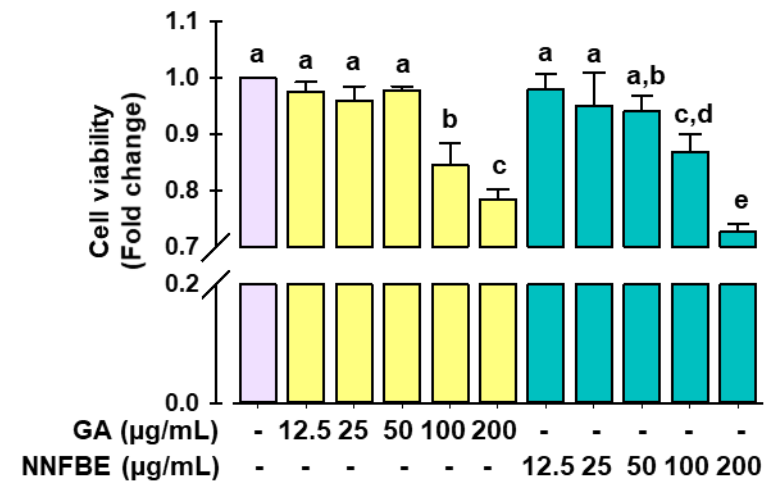

Figure S2: Effect of NNSE on cell viability in RAW264.7 cells. Values are expressed as the mean  $\pm$  SD (n = 3) and different letters are considered as statistically significant ( $p < 0.05$ ) to each other. GA: gallic acid;

## Supplementary Data

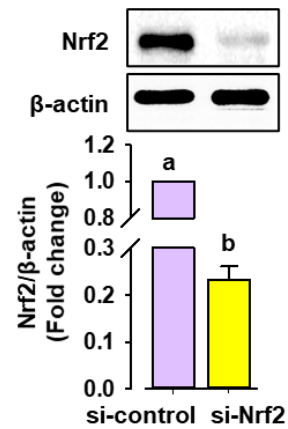

Figure S3: Nrf2 expression using si-RNA in RAW264.7 cells. Values are expressed as the mean  $\pm$  SD (n = 3) and different letters are considered as statistically significant ( $p < 0.05$ ) to each other.

**Table S1: List of the primary antibodies used in the study.**

| <b>Name</b>         | <b>Catalog no.</b> | <b>Company</b>                 | <b>Antigen</b> | <b>Host</b> | <b>Dilutions</b> | <b>Membrane</b>         |
|---------------------|--------------------|--------------------------------|----------------|-------------|------------------|-------------------------|
| Anti-SOD1           | BS91268            | Bioworld Technology, Inc.      | SOD1           | Rabbit      | 1:1000           | Nitrocellulose membrane |
| Anti-catalase       | BS90194            | Bioworld Technology, Inc.      | Catalase       | Rabbit      | 1:1000           | Nitrocellulose membrane |
| anti-GPx-1          | MB9027             | Bioworld Technology, Inc.      | GPx-1          | Mouse       | 1:1000           | Nitrocellulose membrane |
| Anti-HO-1           | sc-136256          | Santa Cruz Biotechnology, Inc. | HO-1           | Mouse       | 1:1000           | Nitrocellulose membrane |
| Anti Nrf2           | sc-81342           | Santa Cruz Biotechnology, Inc. | Nrf2           | Mouse       | 1:1000           | Nitrocellulose membrane |
| Anti-Lamin B        | BS3547             | Bioworld Technology, Inc.      | Lamin B        | Rabbit      | 1:1000           | Nitrocellulose membrane |
| Anti-p-p38          | sc-166182          | Santa Cruz Biotechnology, Inc. | p38            | Mouse       | 1:1000           | Nitrocellulose membrane |
| Anti-p38            | BS3567             | Bioworld Technology, Inc.      | p38            | Rabbit      | 1:1000           | Nitrocellulose membrane |
| Anti-p-ERK1/2       | sc-7383            | Santa Cruz Biotechnology, Inc. | ERK            | Mouse       | 1:1000           | Nitrocellulose membrane |
| Anti-ERK1/2         | BS 6472            | Bioworld Technology, Inc.      | ERK            | Rabbit      | 1:1000           | Nitrocellulose membrane |
| Anti-p-JNK          | BS 4322            | Bioworld Technology, Inc.      | JNK            | Rabbit      | 1:1000           | Nitrocellulose membrane |
| Anti-JNK            | sc-7345            | Santa Cruz Biotechnology, Inc. | JNK            | Mouse       | 1:1000           | Nitrocellulose membrane |
| Anti- $\beta$ actin | Sc-47778           | Santa Cruz Biotechnology, Inc. | $\beta$ -actin | Mouse       | 1:1000           | Nitrocellulose membrane |
